# Supplementary material for: Detection of syrup adulterants in manuka and jarrah honey using HPTLC-multivariate data analysis
Source: PeerJ journal article supplement (doi:10.7717/peerj.12186), 2021-09-22
Supplement: Supplementary_Materials_-_3.pdf [file Supplementary_Materials_-_3.pdf]

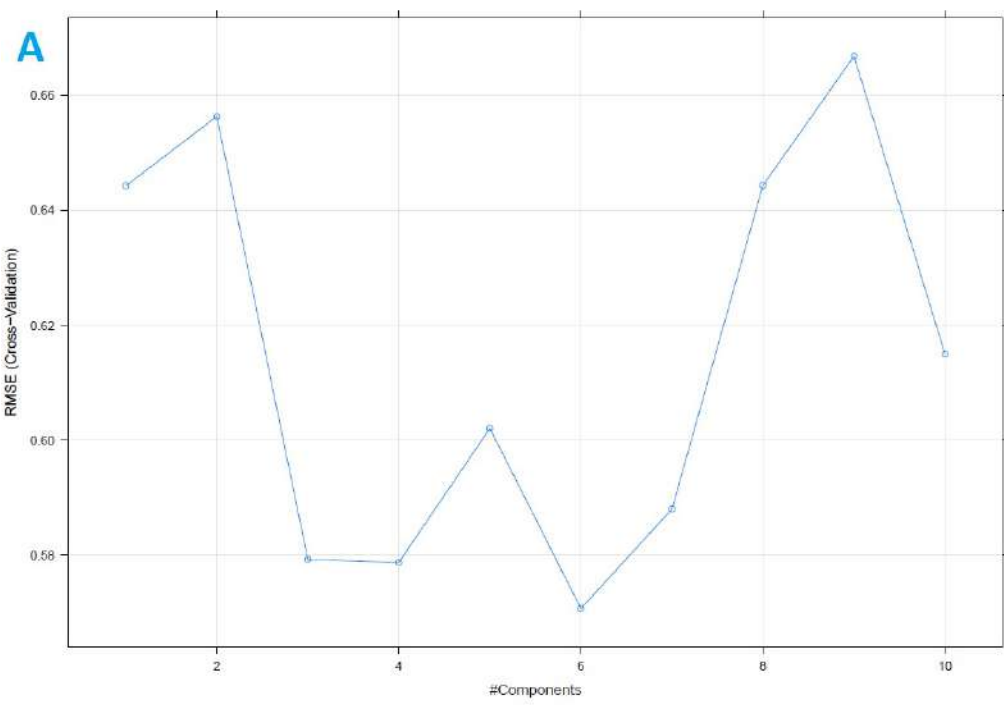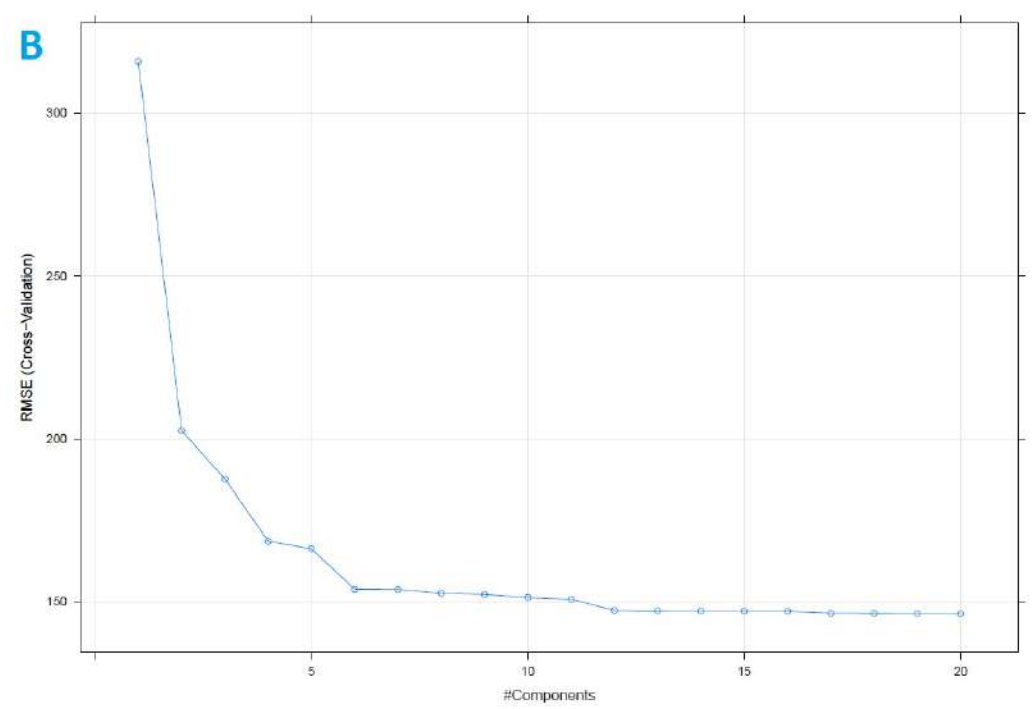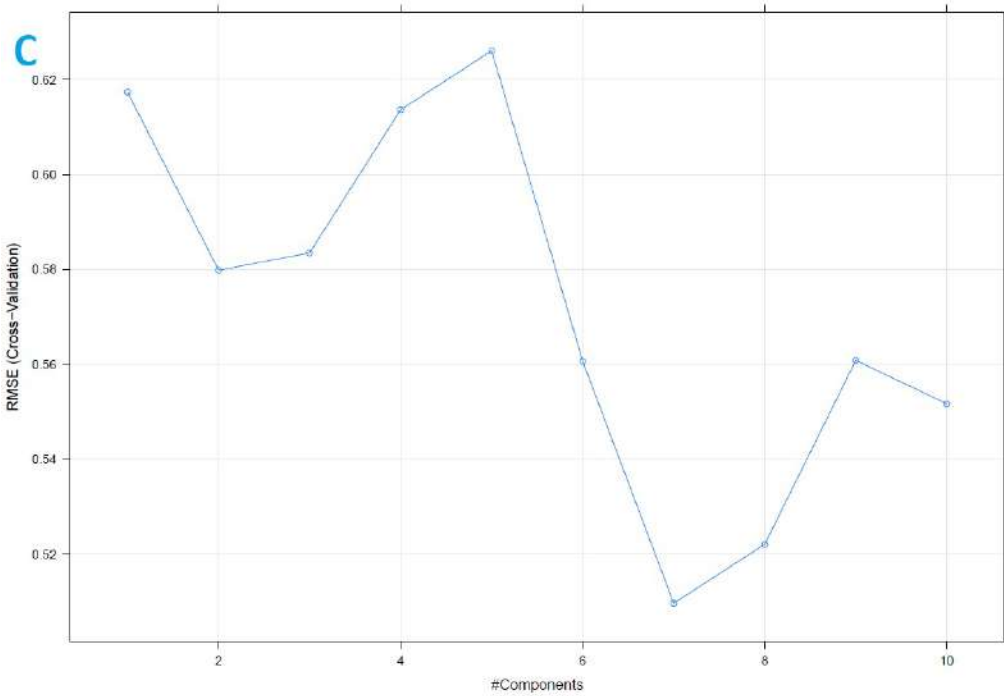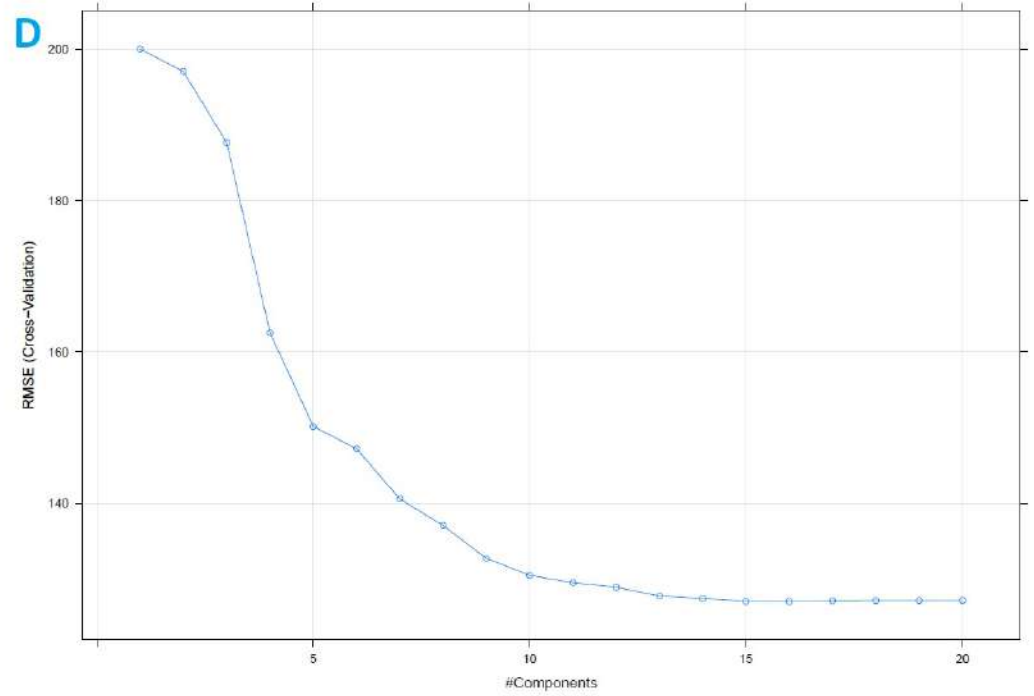

Fructose: PCR - Standardized data (a), PCR - Augmented data (b), PLS - Standardized data (c), and PLS - Augmented data (d)

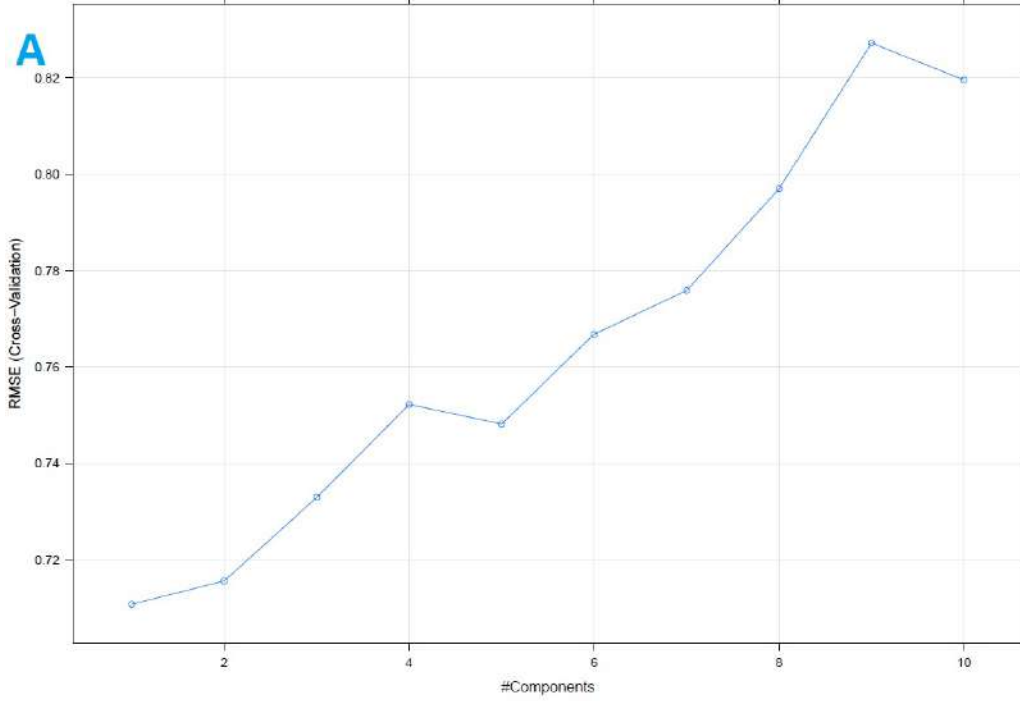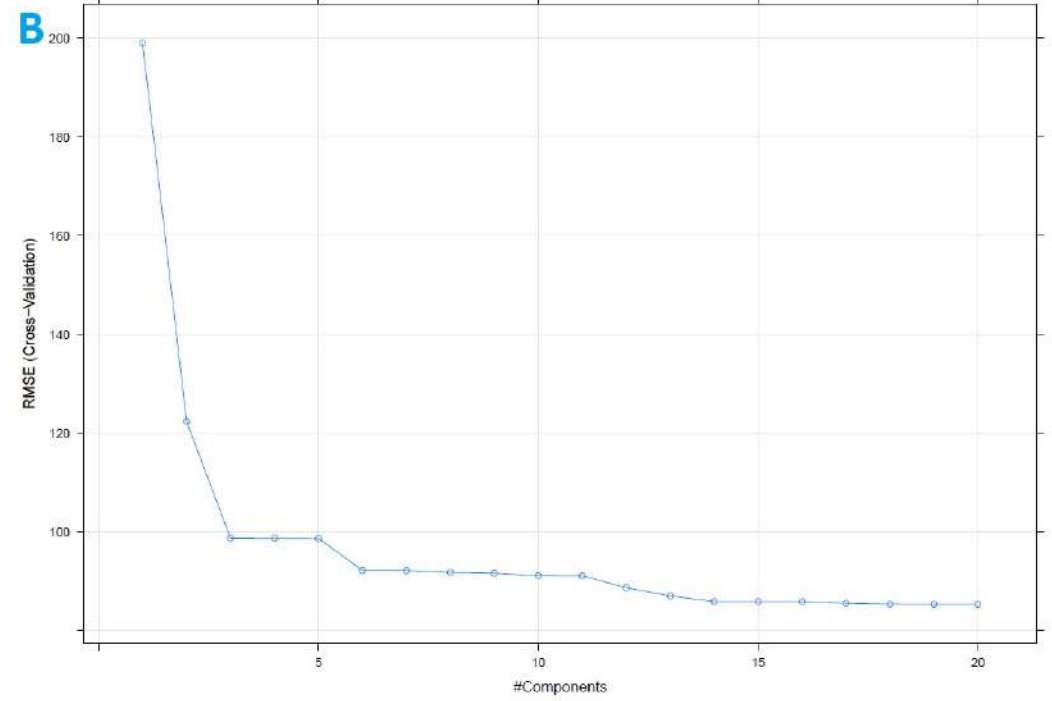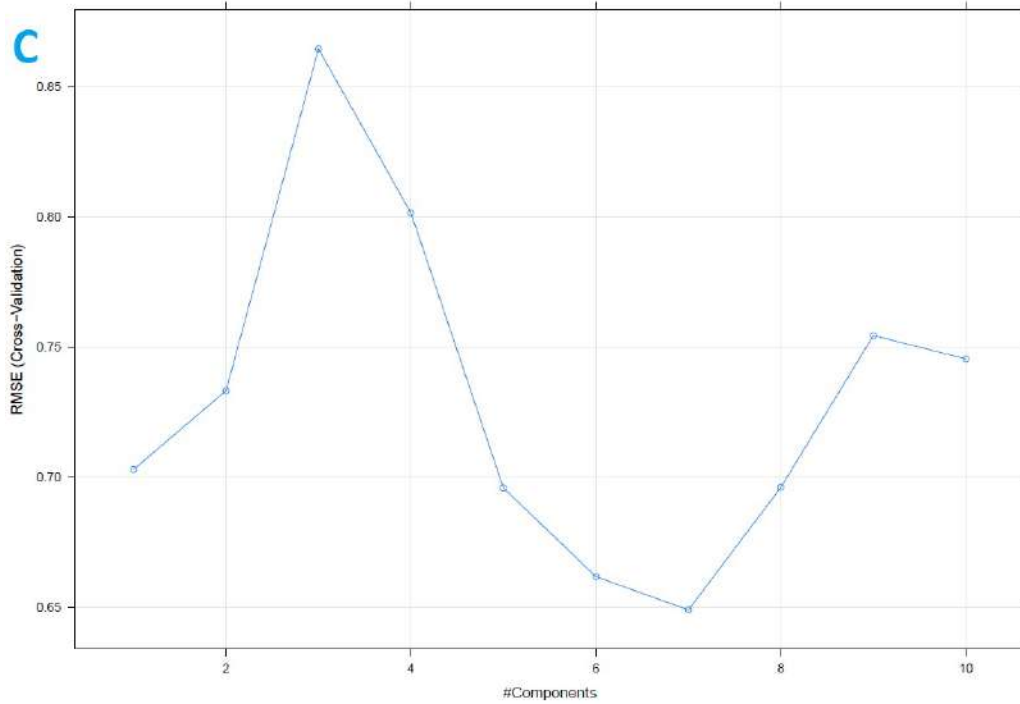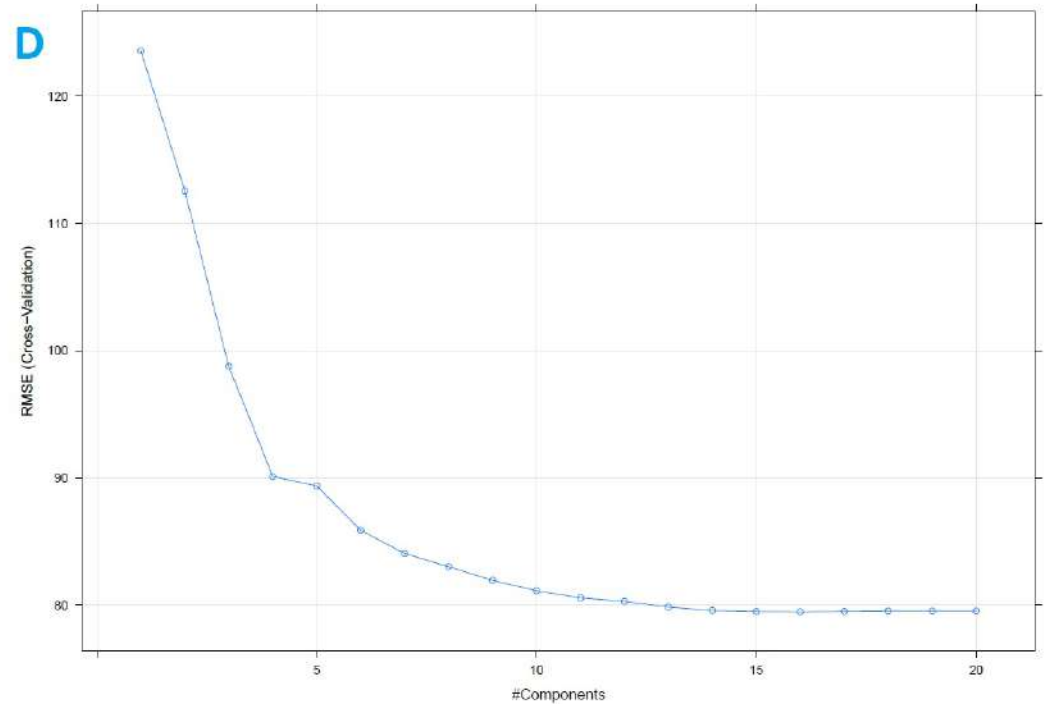

Maltose: PCR - Standardized data (a), PCR - Augmented data (b), PLS - Standardized data (c), and PLS - Augmented data (d)

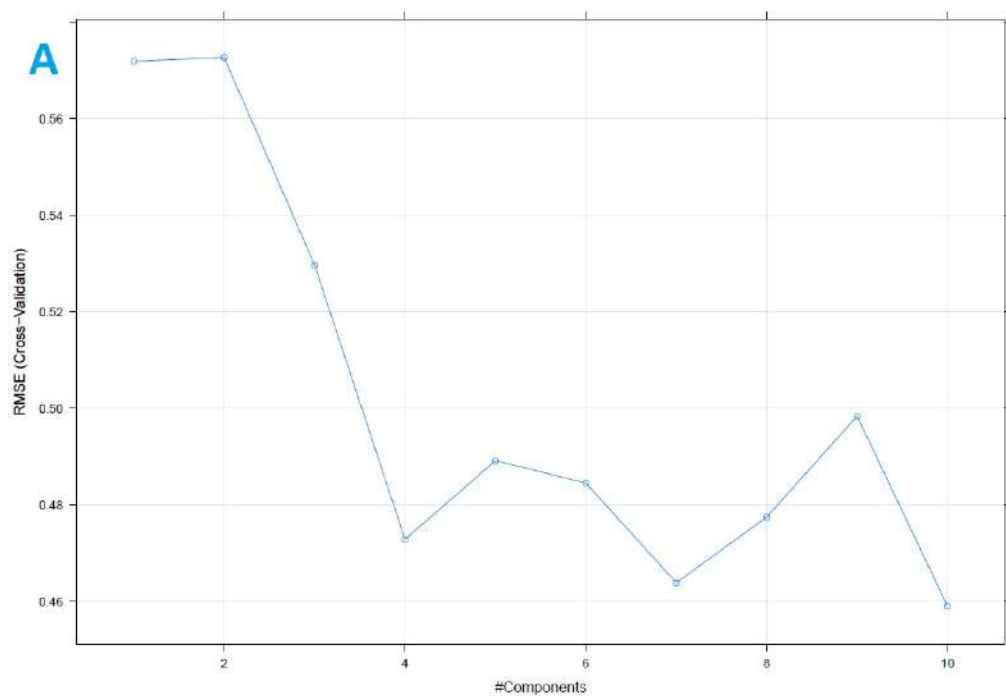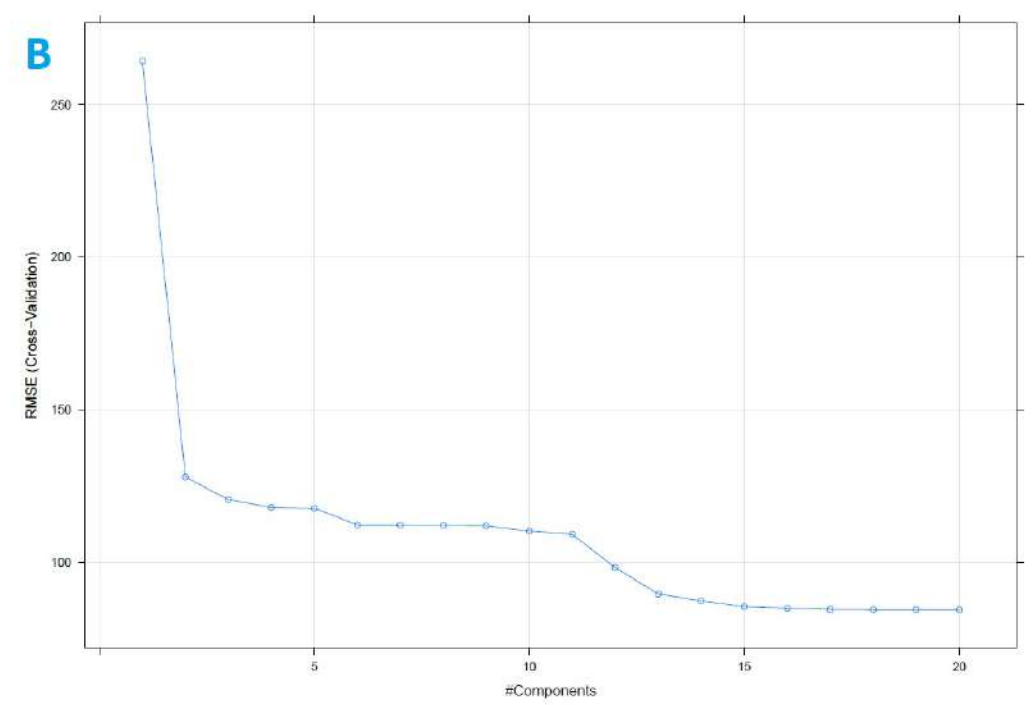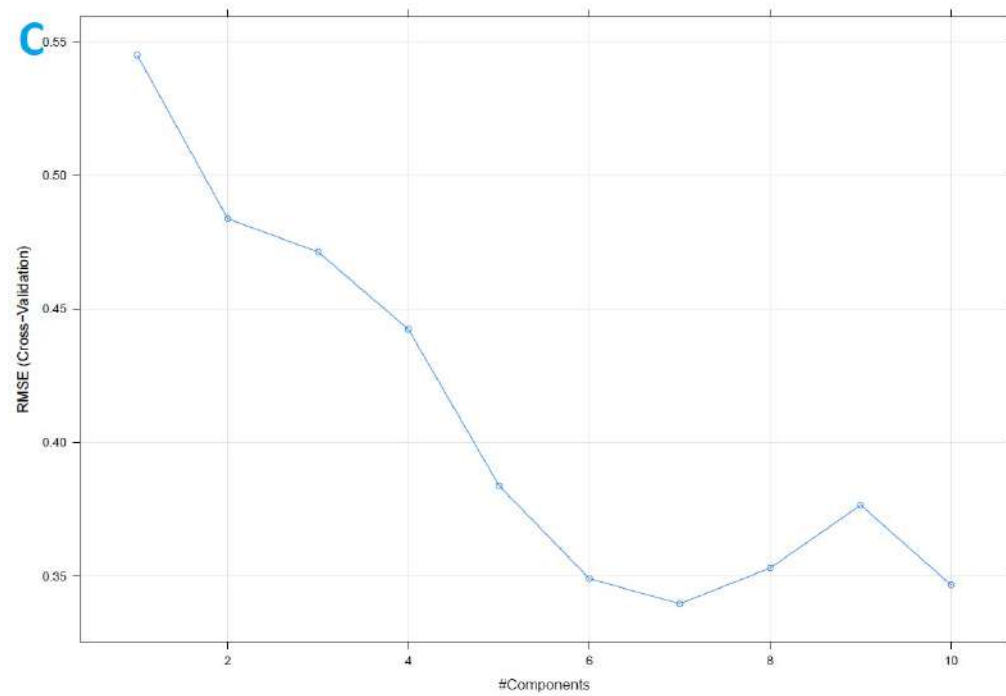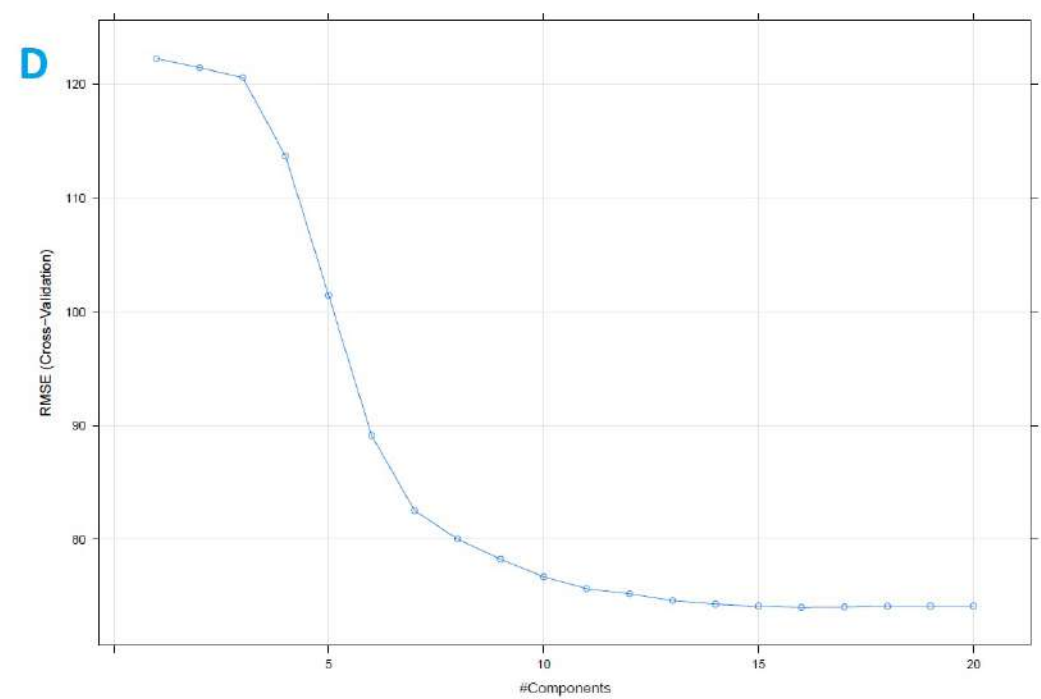

Sucrose: PCR - Standardized data (a), PCR - Augmented data (b), PLS - Standardized data (c), PLS - Augmented data (d)
